# Supplementary material for: Characterization and authentication of four important edible oils using free phytosterol profiles established by GC-GC-TOF/MS
Source: Royal Society of Chemistry journal article supplement (doi:10.1039/c4ay01194e), 2014-01-01
Supplement: c4ay01194e1.pdf [file c4ay01194e1.pdf]

**Table S1** Detailed information of four types of oil seeds used in this study

| Oil seeds          | Geographical origin | Crop year | Oil seeds            | Geographical origin | Crop year |
|--------------------|---------------------|-----------|----------------------|---------------------|-----------|
| Peanut seed 1–5    | Henan, China        | 2013      | Rapeseed 1–5         | Hubei, China        | 2013      |
| Peanut seed 6      | Henan, China        | 2012      | Rapeseed 6–8         | Hunan, China        | 2013      |
| Peanut seed 7      | Shandong, China     | 2012      | Rapeseed 9–10        | Jiangxi, China      | 2013      |
| Peanut seed 8–12   | Shandong, China     | 2013      | Rapeseed 11–12       | Yunnan, China       | 2013      |
| Peanut seed 13–15  | Hebei, China        | 2013      | Rapeseed 13–15       | Guizhou, China      | 2013      |
| Peanut seed 16–17  | Heilongjiang, China | 2013      | Rapeseed 16–18       | Sichuan, China      | 2013      |
| Peanut seed 18     | Jiangsu, China      | 2013      | Rapeseed 19–22       | Zhejiang, China     | 2013      |
| Peanut seed 19     | Guangdong, China    | 2013      | Rapeseed 23–26       | Jiangsu, China      | 2013      |
| Peanut seed 20     | Guangxi, China      | 2013      | Rapeseed 27–28       | Anhui, China        | 2013      |
| Soybean seed 1     | Heilongjiang, China | 2012      | Rapeseed 29–30       | Guangxi, China      | 2012      |
| Soybean seed 2–6   | Heilongjiang, China | 2013      | Rapeseed 31          | Fujian, China       | 2012      |
| Soybean seed 7     | Jilin, China        | 2012      | Rapeseed 32–34       | Shanxi, China       | 2013      |
| Soybean seed 8–11  | Jilin, China        | 2013      | Rapeseed 35–37       | Gansu, China        | 2013      |
| Soybean seed 12–13 | Liaoning, China     | 2013      | Rapeseed 38–40       | Qinghai, China      | 2013      |
| Soybean seed 14    | Hebei, China        | 2012      | Sunflower seed 1–7   | Neimenggu, China    | 2013      |
| Soybean seed 15–16 | Hebei, China        | 2013      | Sunflower seed 8–14  | Xinjiang, China     | 2013      |
| Soybean seed 17–18 | Henan, China        | 2013      | Sunflower seed 15–16 | Gansu, China        | 2013      |
| Soybean seed 19    | Shandong, China     | 2013      | Sunflower seed 17–19 | Ningxia, China      | 2013      |
